# Supplementary material
Source: PubMed Central journal article supplement (PMC4013262)

# Web-based Supporting Materials for: Analytic Methods for Individually Randomized Group Treatment Trials and Group-Randomized Trials When Subjects Belong to Multiple Groups

Rebecca. R. Andridge<sup>a</sup>, Abigail B. Shoben<sup>a</sup>, Keith E. Muller<sup>b</sup>, David M. Murray<sup>c</sup>

<sup>a</sup> Division of Biostatistics, College of Public Health, The Ohio State University, Columbus, OH, 43210

<sup>b</sup> Department of Health Outcomes and Policy, College of Medicine, University of Florida, Gainesville, FL, 32610

<sup>c</sup> Division of Intramural Population Health Research, Eunice Kennedy Shriver National Institute of Child Health and Human Development, National Institutes of Health, Rockville, MD 20892

**Supplementary Table 1:** Summary of Type I error simulation with  $N = 864$  and 6 B groups, with balanced allocation of subjects to B groups. Results are displayed as the number (%) of cells in simulation experiment where type I error was significantly below or above the nominal 5% based on simulation error bounds, and the range of observed type I error rates.

|           | Model           | Below    | Above     | Type I Error Range |
|-----------|-----------------|----------|-----------|--------------------|
| $n_B = 6$ | AB (KR nobound) | 7 (22%)  | 8 (25%)   | 1.4-11.9           |
|           | AB (KR bound)   | 18 (56%) | 0 (0%)    | 1.6-5.8            |
|           | A (KR nobound)  | 0 (0%)   | 14 (44%)  | 3.7-52.8           |
|           | A (emp)         | 0 (0%)   | 32 (100%) | 7.4-61.2           |
|           | B (KR nobound)  | 1 (3%)   | 17 (53%)  | 3.4-53.5           |
|           | B (emp)         | 0 (0%)   | 32 (100%) | 7.1-61.7           |
|           | IND             | 0 (0%)   | 28 (88%)  | 4.9-72.5           |

**Supplementary Figure 1:** Empirical type I error when  $n_B = 6$  (number of B groups equal to number of A groups) for analytic models AB(KR bound) ( $\bullet$ ), AB(KR nobound) ( $\circ$ ): Results from larger sample size of  $N = 864$ .

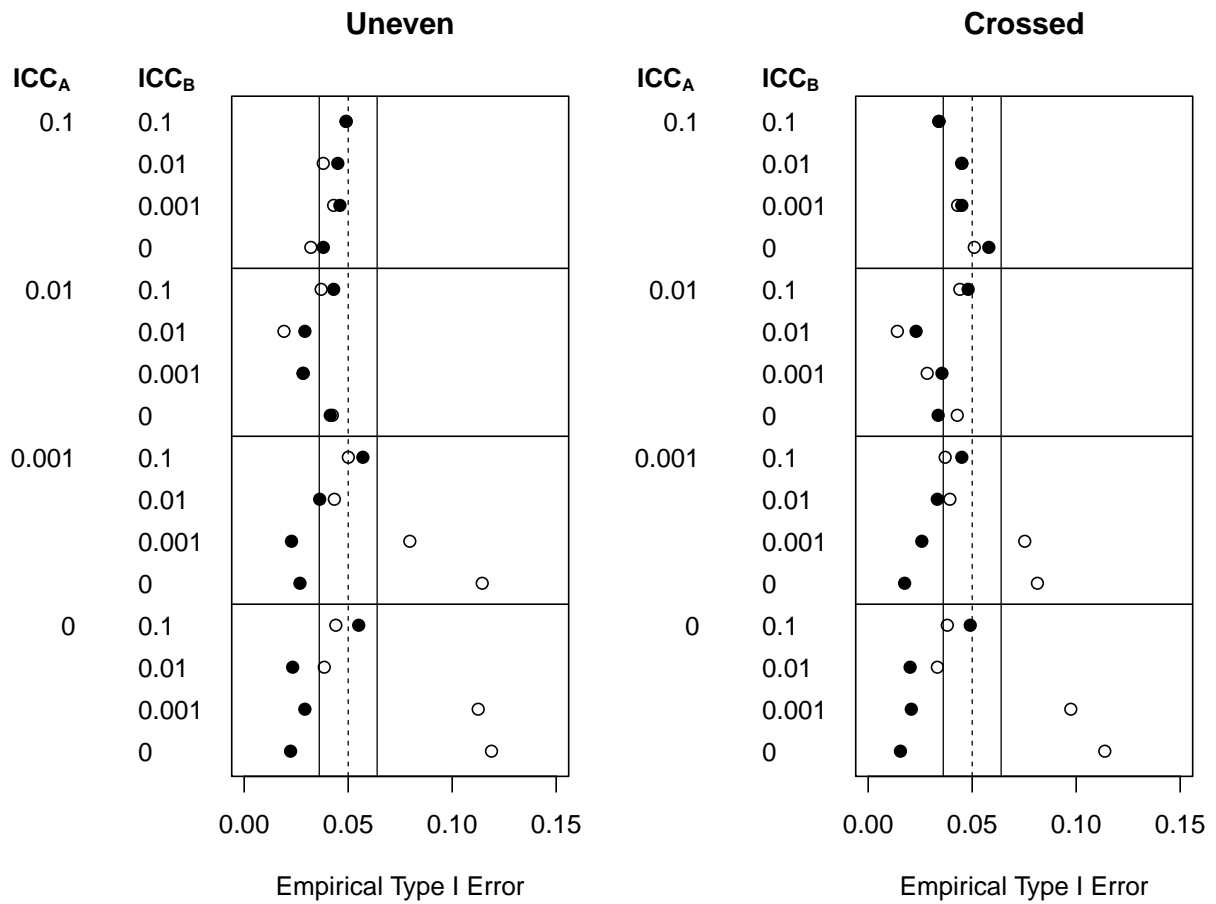

**Supplementary Figure 2:** Empirical power when  $\rho_A = 0$  (no ICC due to A groups) for analytic models AB(KR bound) ( $\bullet$ ), AB(KR nobound) ( $\circ$ ): Results from larger sample size of  $N = 864$ .

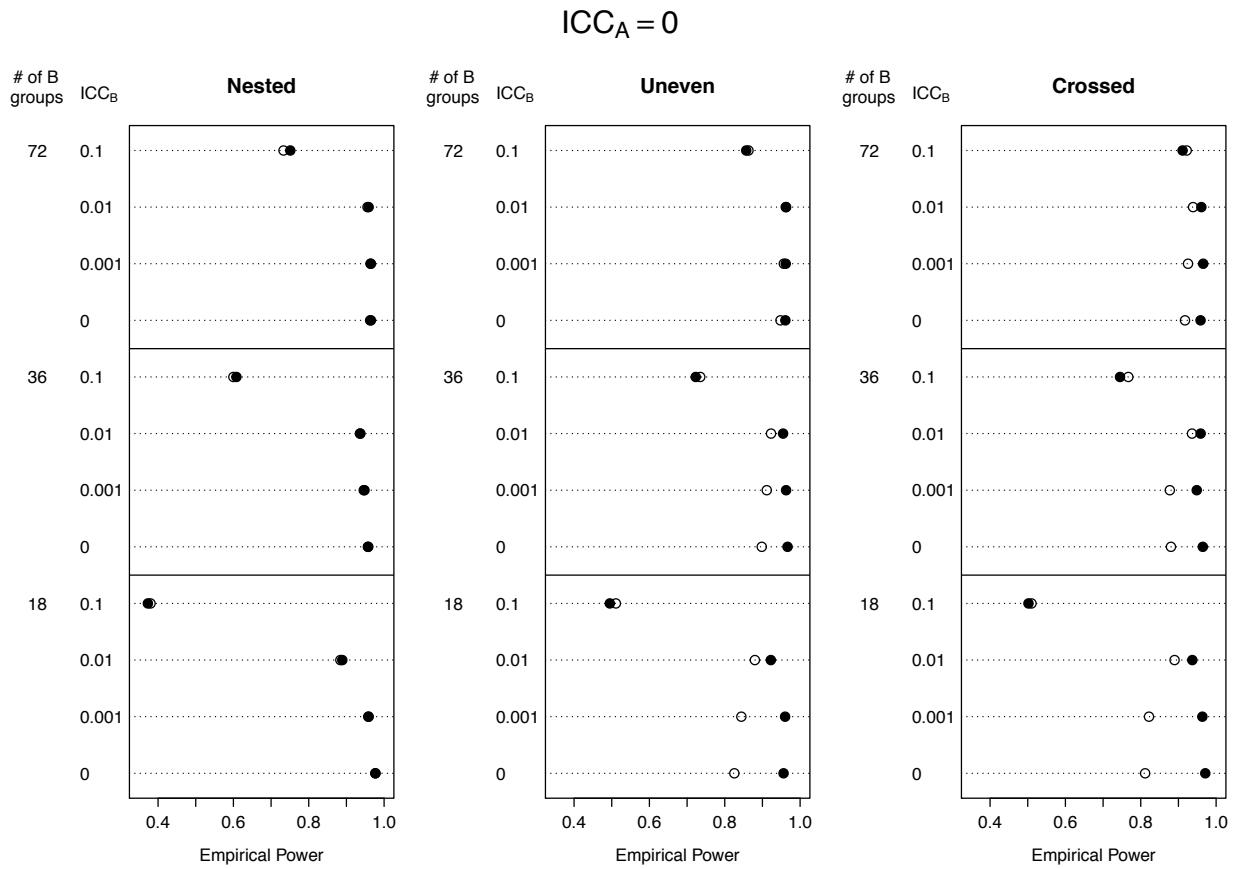

Supplement: NIHMS551052-supplement-Supplementary_Material.pdf [file NIHMS551052-supplement-Supplementary_Material.pdf]
